# Supplementary material for: Energetics of Endotoxin Recognition in the Toll-Like Receptor 4 Innate Immune Response
Source: PubMed Central journal article supplement (PMC4673606; doi:10.1038/srep17997), 2015-12-09
Supplement: srep17997-s1.pdf [file srep17997-s1.pdf]

# Energetics of Endotoxin Recognition in the Toll-Like Receptor 4 Innate Immune Response

## - Supplementary Data.

Teresa Paramo<sup>1</sup>, Susana M. Tomasio<sup>1,2</sup>, Kate L. Irvine<sup>3</sup>, Clare E. Bryant<sup>3</sup>, & Peter J. Bond<sup>4,5\*</sup>

<sup>1</sup> Unilever Centre for Molecular Science Informatics, Department of Chemistry, University of Cambridge, Lensfield Road, Cambridge CB2 1EW, UK

<sup>2</sup> Current Address: Cresset Biomolecular Discovery, New Cambridge House, Bassingbourn Road, Litlington SG8 0SS, UK

<sup>3</sup> Department of Veterinary Medicine, University of Cambridge, Madingley Road, Cambridge CB3 0ES, UK

<sup>4</sup> Bioinformatics Institute (A\*STAR), 30 Biopolis Str, #07-01 Matrix, Singapore 138671.

<sup>5</sup> Department of Biological Sciences, National University of Singapore, 14 Science Drive 4, 117543 Singapore.

\* To whom correspondence should be addressed: Peter J. Bond, Bioinformatics Institute (A\*STAR), 30 Biopolis Str, #07-01 Matrix, Singapore 138671; Tel: +65 6478 8378; E-mail: [peterjb@bii.a-star.edu.sg](mailto:peterjb@bii.a-star.edu.sg).

**Running title:** *Energetic basis for endotoxin recognition.*

September 24, 2015

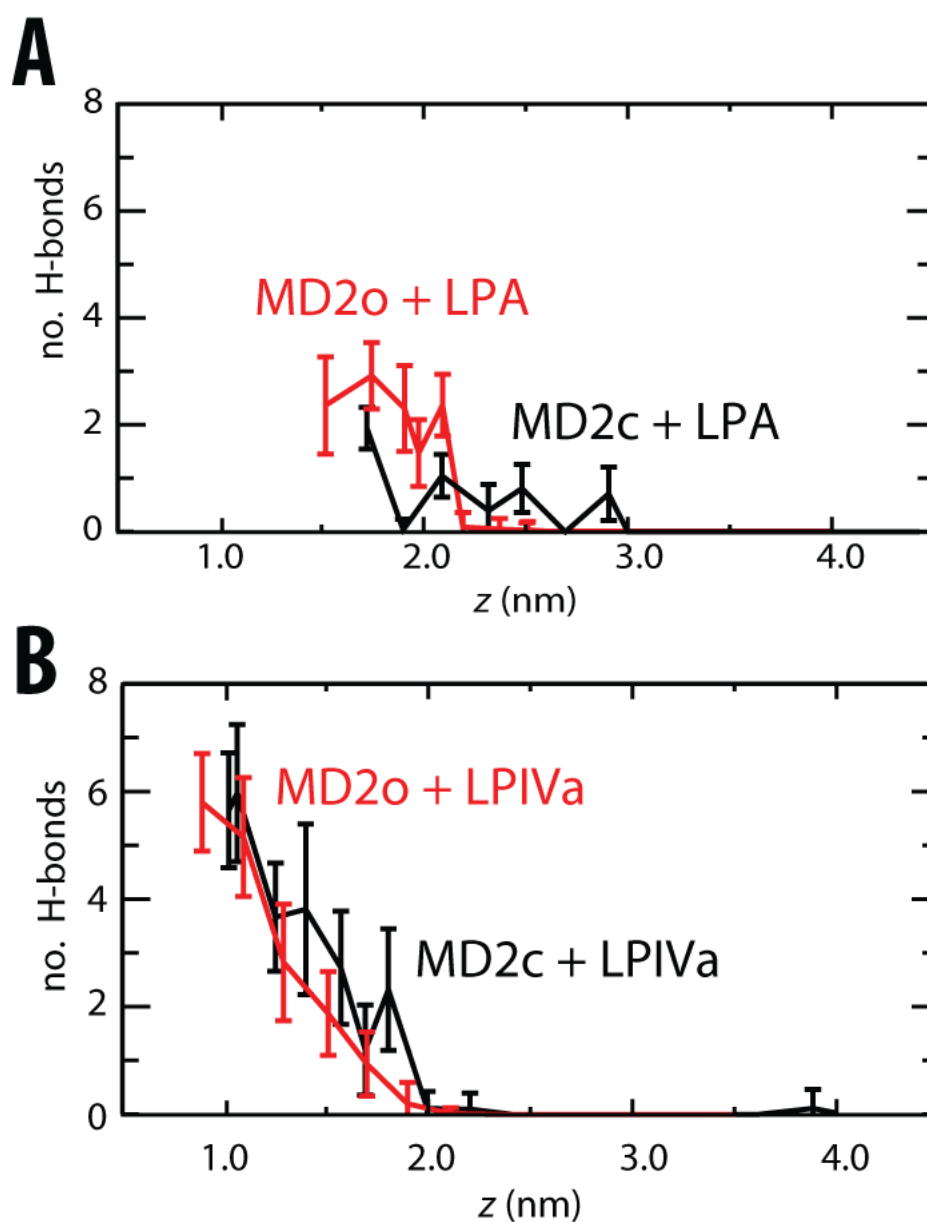

**Figure S1.** Hydrogen-bond interactions with respect to the binding PMF. Mean number of hydrogen-bonds between lipid and protein are shown as a function of  $z$  are for (A) LPA and (B) LPIVa, in both the MD-2c (black) and MD-2o (red) conformational states. Mean and standard deviations are shown for the final 5 ns of the corresponding PMF windows.

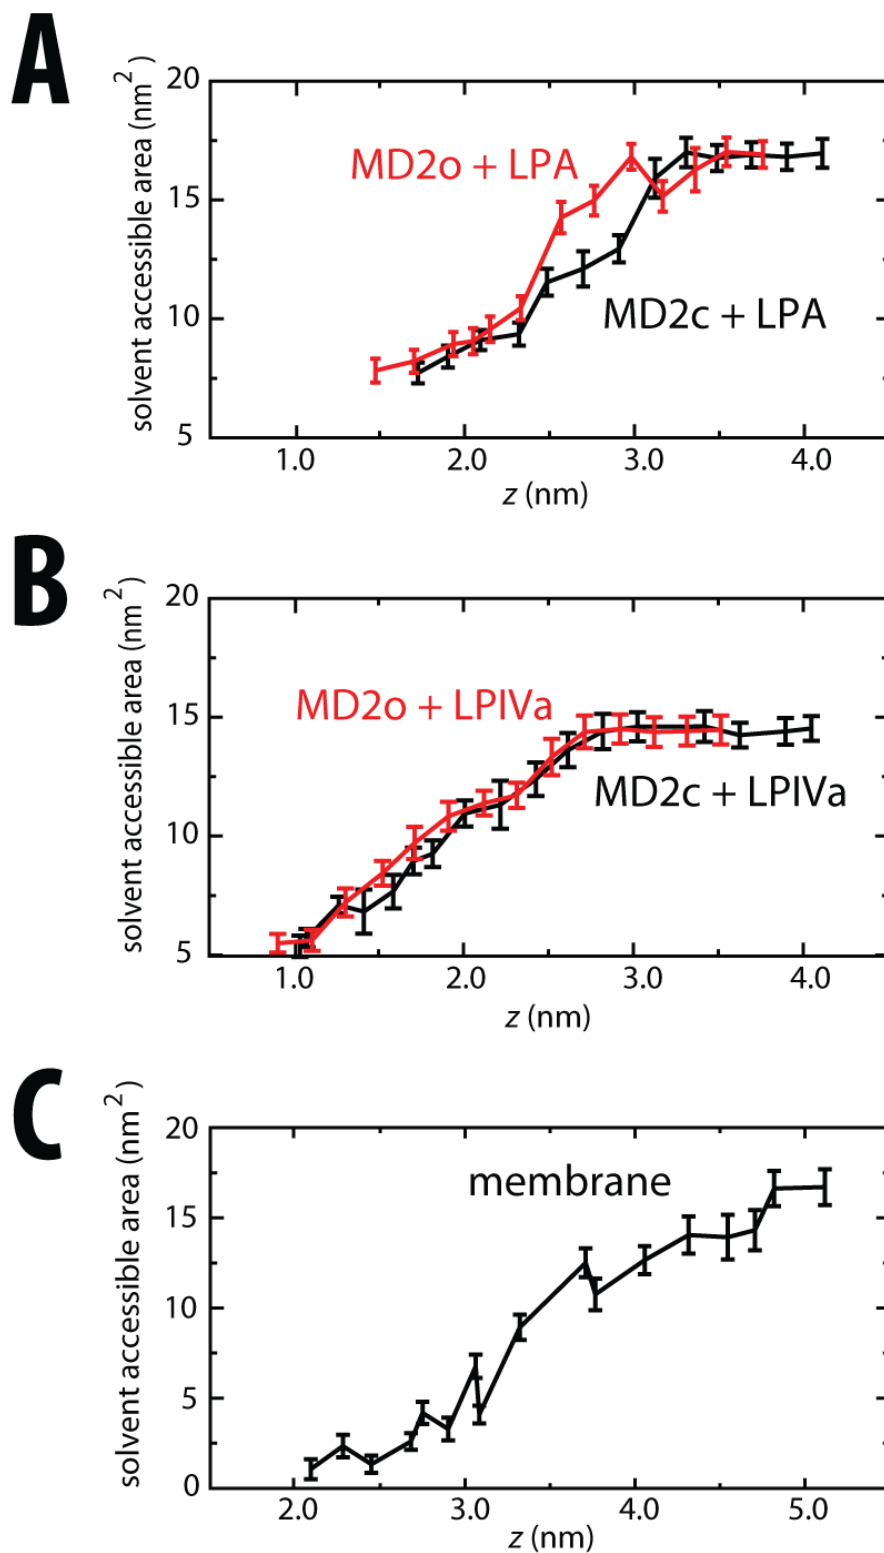

**Figure S2.** Solvent accessible area of single lipid molecule as a function of PMF  $z$ . Data are shown for (A) LPA bound to MD-2c (black) and MD-2o (red), (B) LPIVa bound to MD-2c (black) and MD-2o (red), and (C) LPA bound to membrane. Means and standard deviations are shown for the final 5 ns of the corresponding PMF windows.

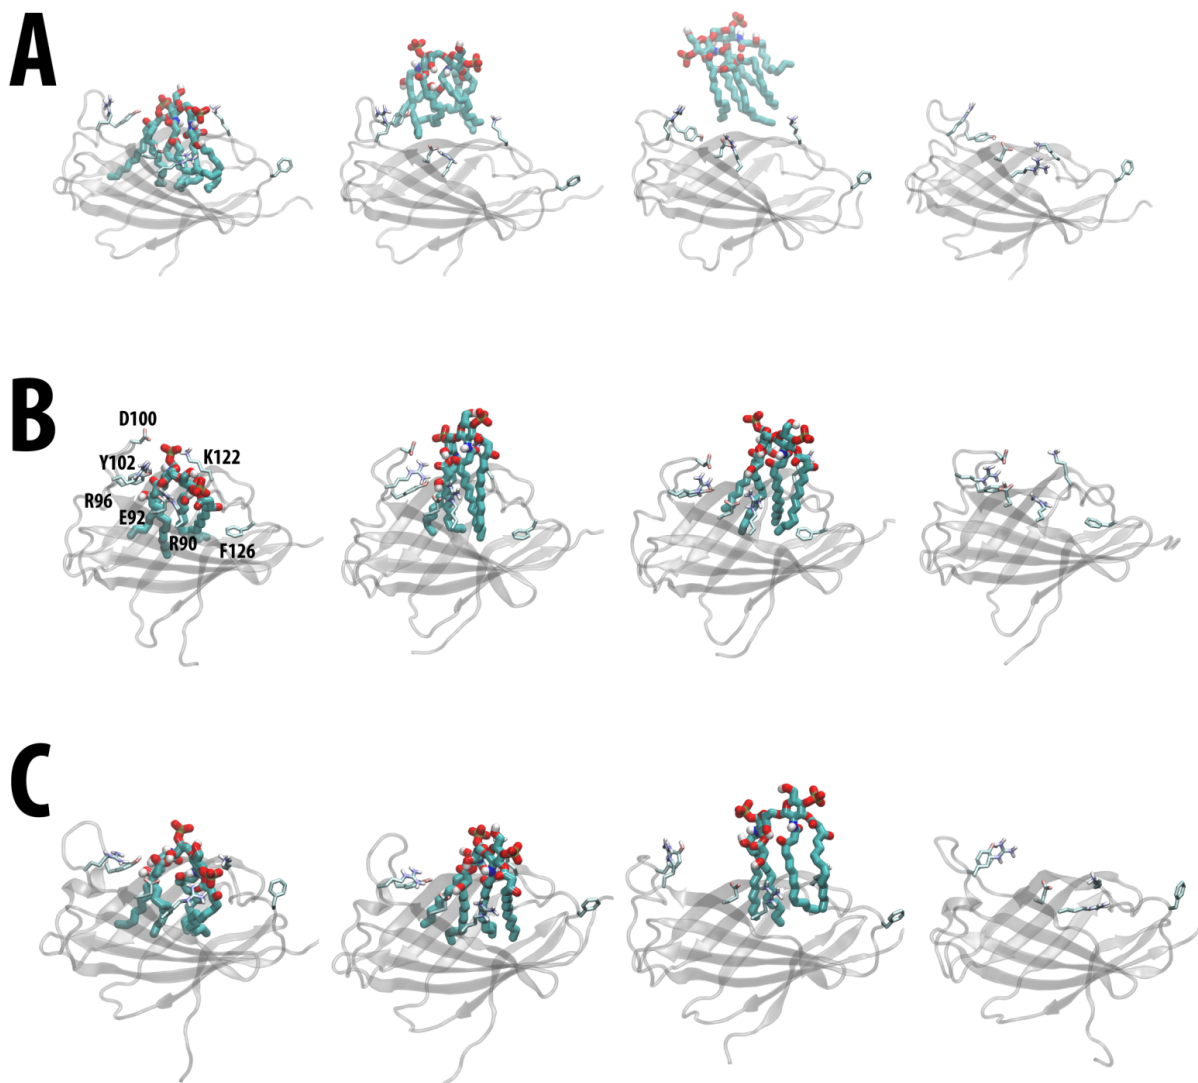

**Figure S3.** The pathway associated with lipid potentials of mean force binding to MD-2. Snapshots are shown for lipid centred at different positions along  $z$  with respect to its equilibrium bound position ( $z_{eq}$ ), as in Fig 2A, for **(A)** MD-2o + LPA, **(B)** MD-2c + LPIVa, and **(C)** MD-2o + LPIVa. The lipid molecule is shown in thick wireframe CPK format. Key side chains are labelled and shown in thin wireframe format, with the MD-2 fold rendered as transparent cartoons.



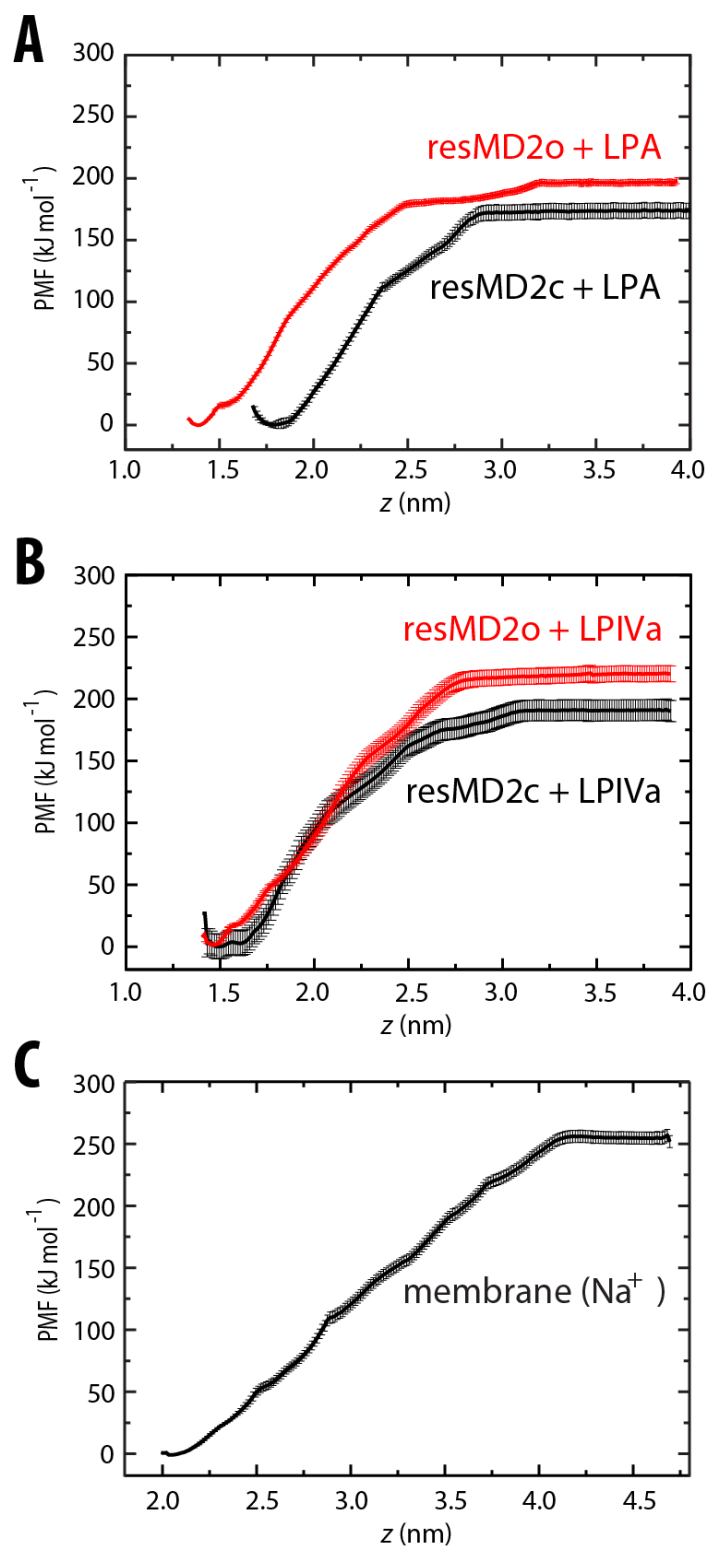

**Figure S4.** Alternative potential of mean force curves for different lipid molecules calculated as a function of  $z$ . PMF curves are shown for ligand binding to protein-restrained MD-2c (black lines) and MD-2o (red lines) for (A) LPA agonist, and (B) LPIVa antagonist. The PMF in (C) represents lipid A binding to a symmetric LPA bilayer in the presence of  $\text{Na}^+$  counterions. The centre of the protein or lipid bilayer is at  $z = 0$  nm. The PMFs have been normalized so that the minimum lies at  $0 \text{ kJ mol}^{-1}$ .

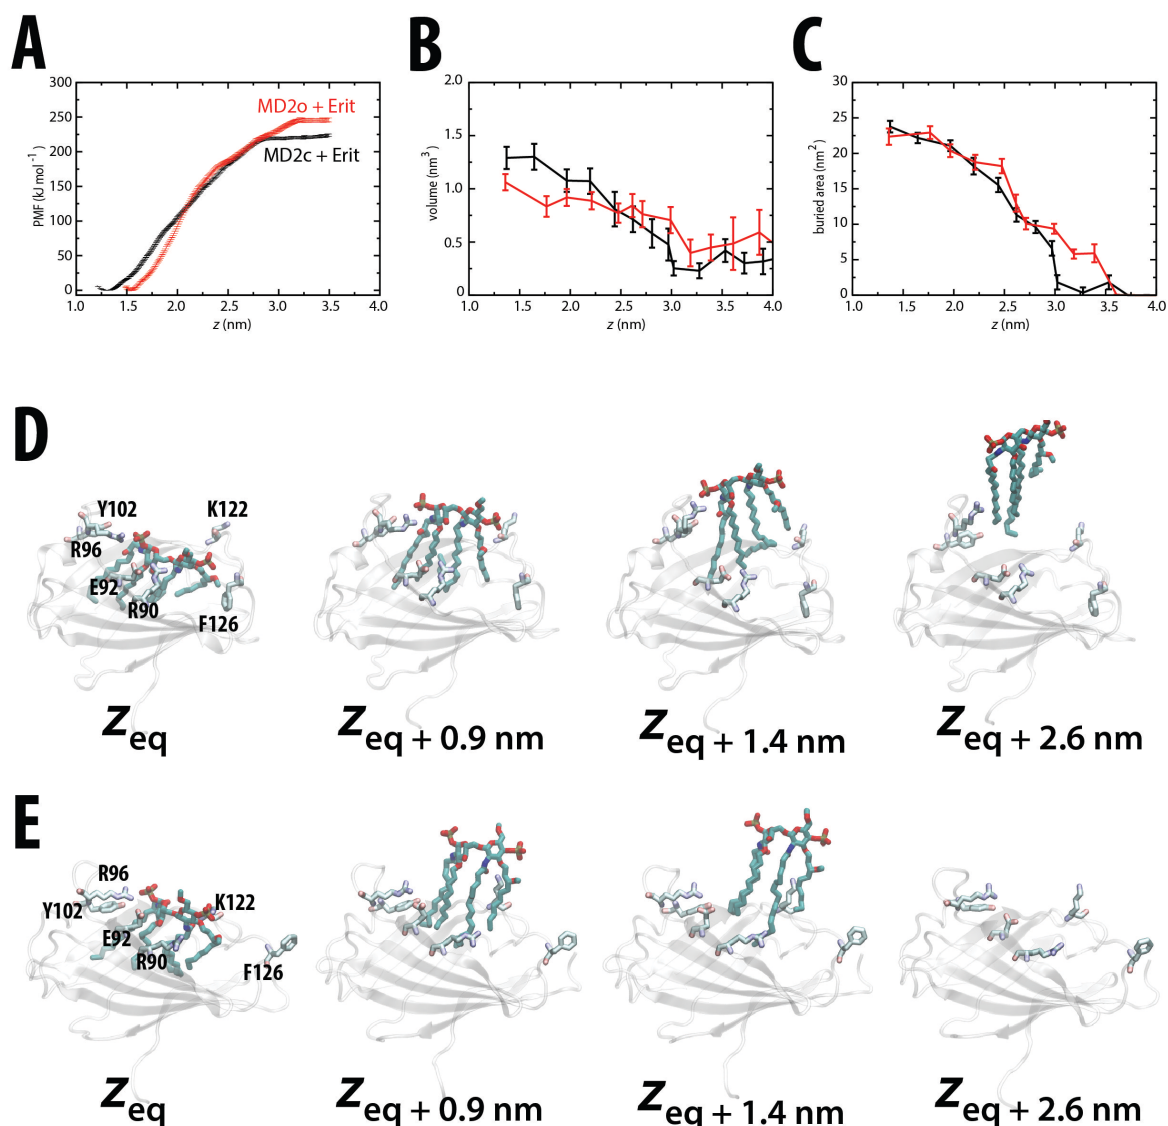

**Figure S5.** Eritoran PMF. **(A)** PMF curves calculated as a function of  $z$  for Eritoran binding to MD-2c (black line) and MD-2o (red line). The PMFs have been normalized so that the minimum lies at 0 kJ mol<sup>-1</sup>. Sample standard deviation was estimated using 200 bootstraps over converged data. **(B)** Protein cavity volume and **(C)** buried surface area between protein and lipid, both shown as a function of PMFs for Eritoran binding to MD-2c (black line) and MD-2o (red line). Protein cavity volume was calculated using `trj_cavity`, and mean and standard deviations are shown for the final 5 ns of the corresponding PMF windows. Snapshots of Eritoran at different positions along  $z$  with respect to its equilibrium bound position ( $z_{eq}$ ), are shown for **(D)** MD-2c and **(E)** MD-2o. The lipid molecule is shown in thick wireframe CPK format. Key side chains are labelled and shown in thin wireframe format, with the MD-2 fold rendered as transparent cartoons.

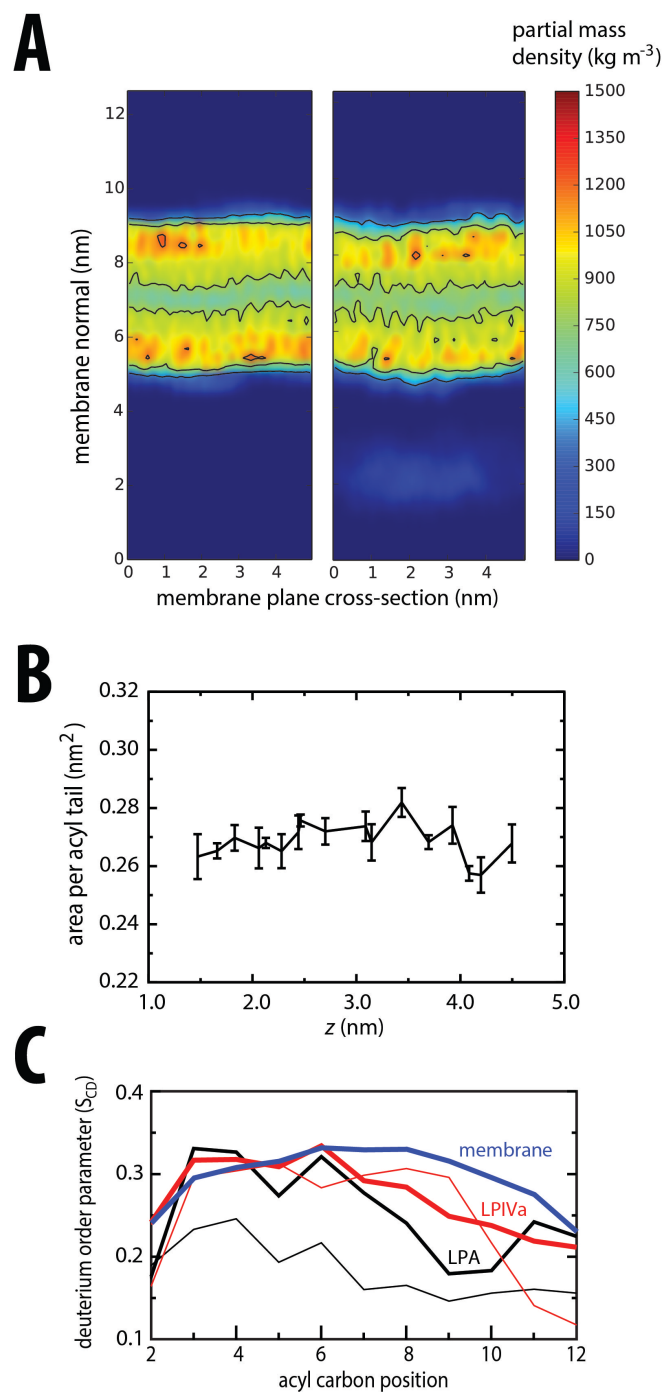

**Figure S6.** Dependence of lipid and membrane structure/dynamics upon PMF for extraction of LPA from symmetric LPA bilayer in presence of  $\text{Mg}^{2+}$ . **(A)** Contour map of lipid partial density for bilayer cross-section calculated along membrane normal, at equilibrium (left) and upon extraction of a single LPA molecule (right). **(B)** Mean area per acyl tail of bilayer, calculated as a function of PMF  $z$ . Mean and standard deviation are calculated over the final 5 ns of each window. **(C)** Deuterium order parameters, averaged across all acyl chains, calculated for LPA within a bilayer phase (blue), and for LPA (black) and LPIVa (red) at their equilibrium bound position  $z_{eq}$  in MD-2c (thick lines) and MD-2o (thin lines) protein conformations. In the dissolved state, the mean  $S_{CD}$  across all acyl tail carbons is  $<0.1$  for both LPA and LPIVa. Order parameters were calculated with respect to the membrane normal, or in the case of protein, the cavity axis was defined as the reference vector.

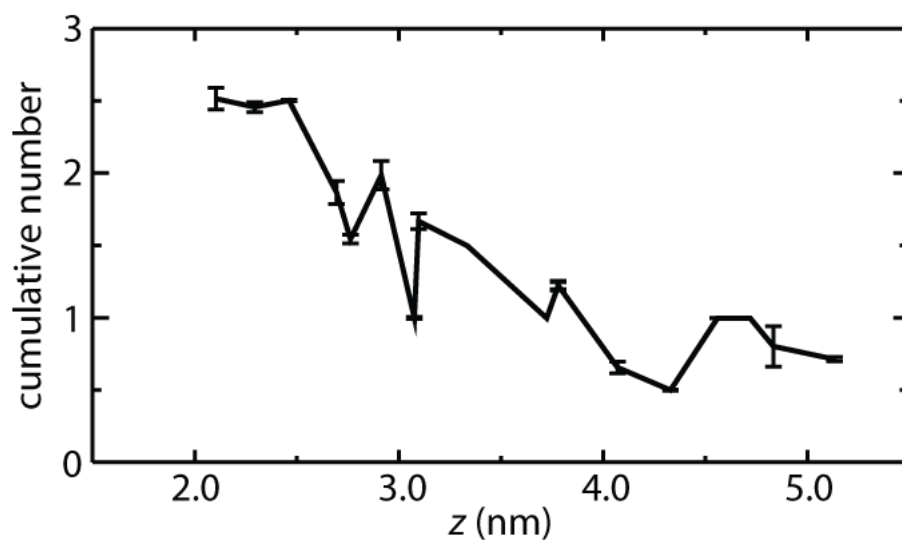

**Figure S7.** Cumulative number of  $\text{Mg}^{2+}$  ions within  $\leq 1$  nm of phosphate oxygens of single LPA molecule as a function of PMF  $z$  in membrane system. Means are calculated from RDFs over the final 5 ns of each window, with standard deviations estimated by calculating individual RDFs over five 1 ns windows.

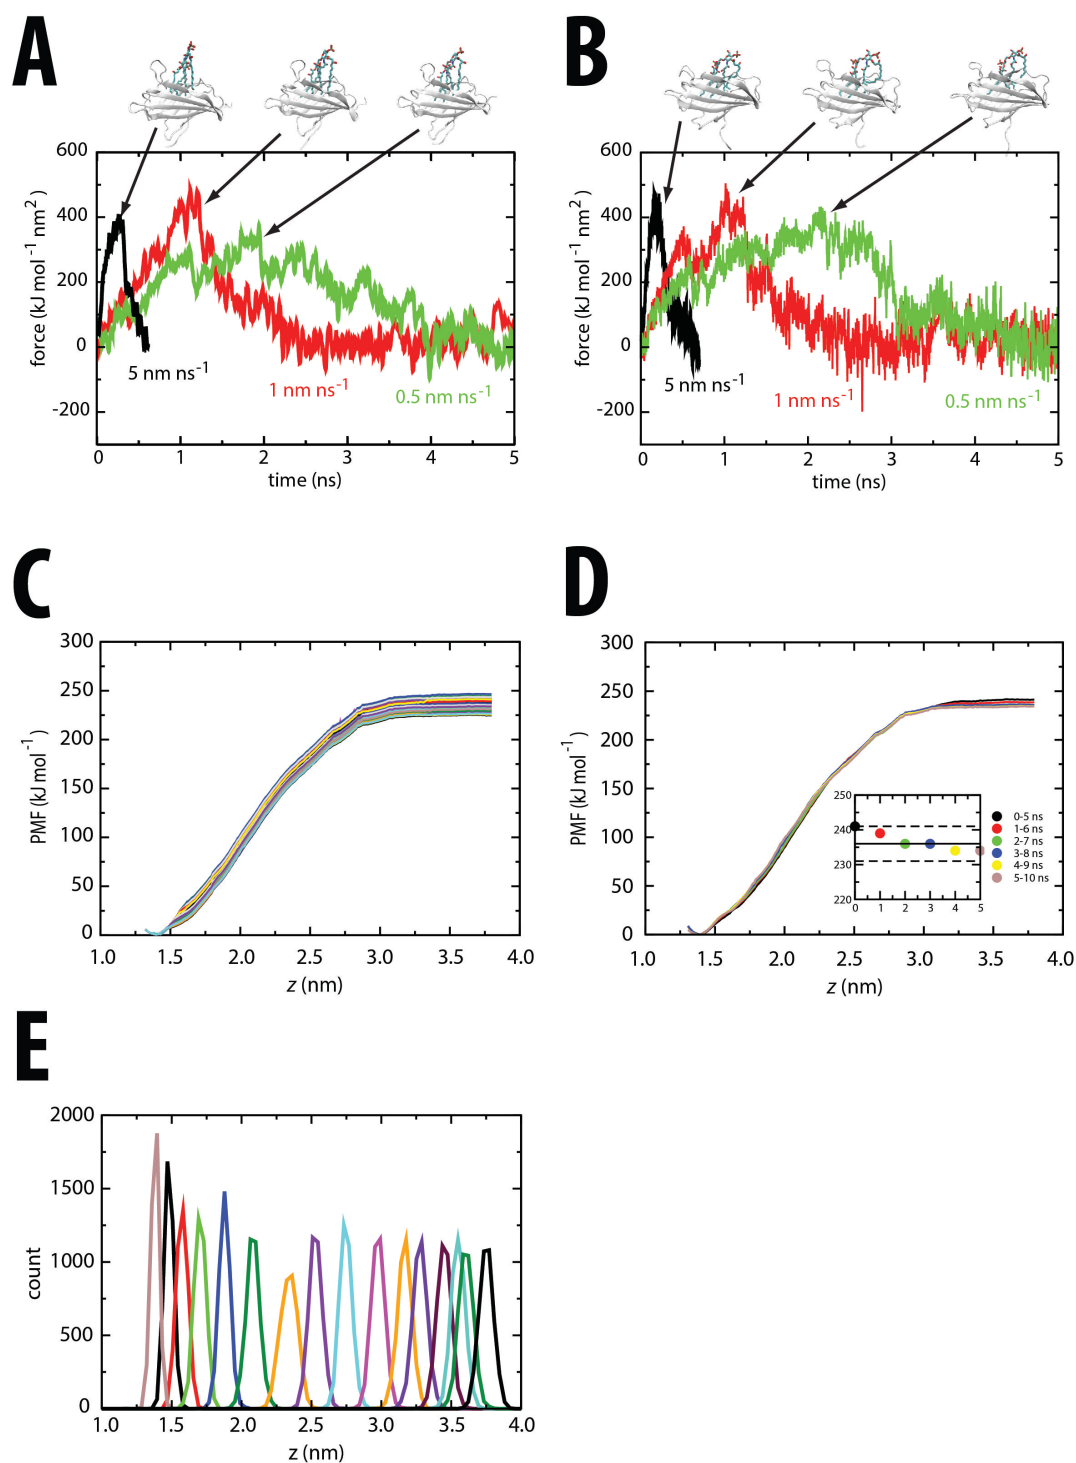

**Figure S8.** Convergence of steered MD and PMF calculations. Force versus time curves during steered MD simulations are shown for (A) MD-2c+LPIVa, and (B) MD-2o+LPIVa. Snapshots corresponding to the point of rupture (maximum pulling force) are shown above each graph. Data are shown for several independent pulling simulations, using spring velocities of 5 nm ns<sup>-1</sup> (black), 1 nm ns<sup>-1</sup> (red), and 0.5 nm ns<sup>-1</sup> (green). Example convergence data are shown for MD-2o+LPIVa PMFs in terms of (C) bootstrap WHAM profiles, (D) successive, overlapping 5 ns block profiles with average total free energies shown inset, and (E) unbiased umbrella sampling histograms.

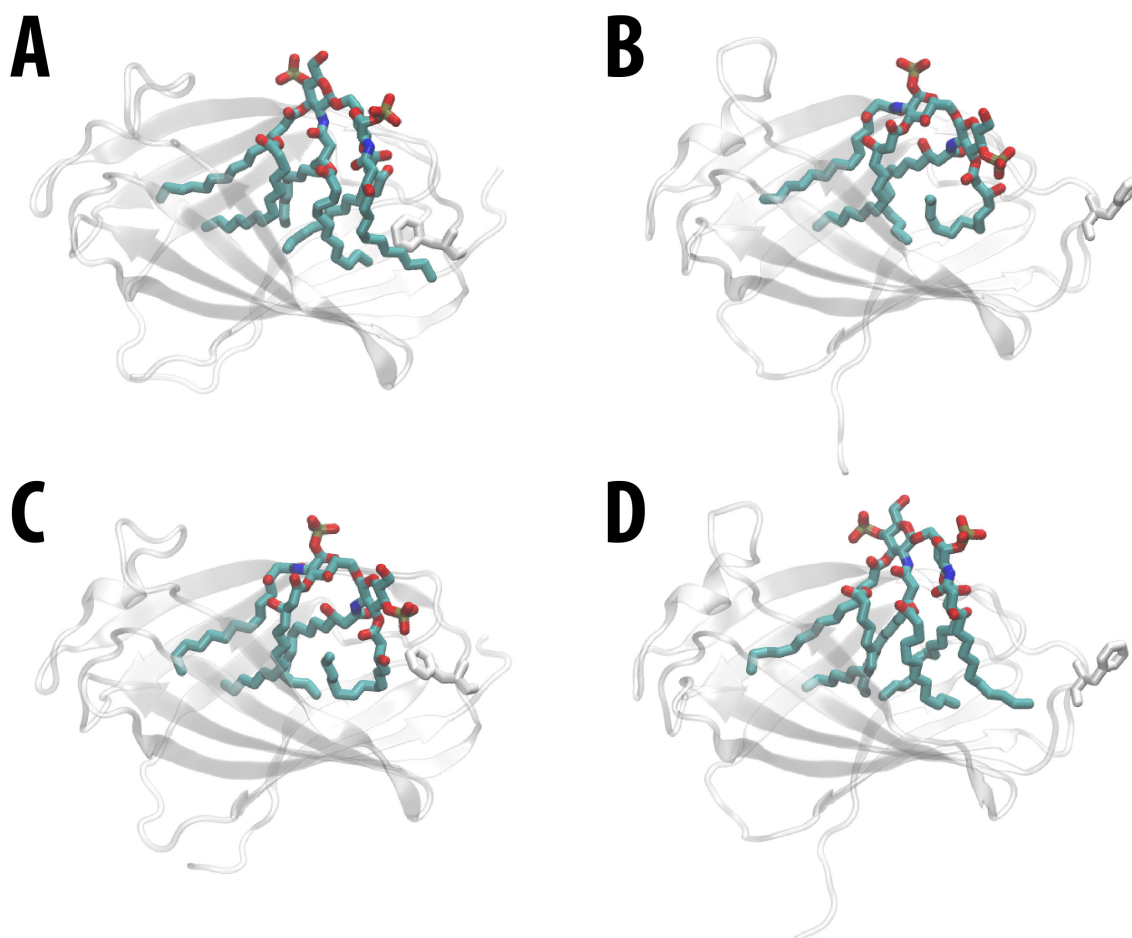

**Figure S9.** Setup of human MD-2 simulation systems. Snapshots are shown for **(A)** MD-2c bound to lipid A, obtained from the crystal structure of the active TLR4•MD-2 receptor complex bound to LPS<sup>14</sup> (pdb: 3FXI), and **(B)** the crystal structure of MD-2o bound to lipid IVa (pdb: 2E59). Snapshots of the corresponding “opposite” MD-2 configurations were obtained via pair-wise structural alignment and retention of ligand coordinates, as shown for **(C)** MD-2c bound to lipid IVa, and **(D)** MD-2o bound to lipid A.
